# Supplementary material
Source: MDPI journal article supplement (https://www.mdpi.com/2073-445X/11/11/2012)
Supplement: s1 [file s1]

**Table S1.** Bioclimatic variable name, the commonly used abbreviation, and equation for the 19 bioclimatic variables used in this study.

| Variable Name                                                    |
|------------------------------------------------------------------|
| Monthly Mean Precipitation                                       |
| Monthly Mean Solar Radiation                                     |
| Average Monthly Temperature                                      |
| Maximum Monthly Temperature                                      |
| Minimum Monthly Temperature                                      |
| Elevation                                                        |
| Slope                                                            |
| Aspect                                                           |
| Terrain Roughness                                                |
| Elevation difference of center vs. mean of surrounding 1km cells |
| Elevation difference of center vs. mean of surrounding 3km cells |
| Elevation difference of center vs. mean of surrounding 5km cells |
| Minimum Soil pH                                                  |
| Average Soil pH                                                  |
| Maximum Soil pH                                                  |
| Fragments in size of 3-10cm                                      |
| Sieve no. 4                                                      |
| Sieve no. 10                                                     |
| Sieve no. 40                                                     |
| Sieve no. 200                                                    |
| Percent Sand                                                     |
| Percent Clay                                                     |
| Percent Silt                                                     |
| Organic Matter Residue                                           |
| Soil Dry Weight                                                  |
| Phosphorus Saturation                                            |
| Available Water Capacity                                         |
| Water Saturation                                                 |
| Mean Temperature of the Coldest Quarter                          |
| Annual Precipitation                                             |
| Precipitation of Wettest Month                                   |
